# Supplementary material
Source: PubMed Central journal article supplement (PMC5423398)
Supplement: NIHMS861350-supplement.pdf [file NIHMS861350-supplement.pdf]

# RUNNING HEAD: Impact of Attendance on Quit Success

## Supplemental Material

**Table S1.** Results for the final model predicting abstinence rates.

| <b>Final Model</b>                       | <b><math>\beta</math></b> | <b>95% CI</b>    | <b><i>t</i></b> | <b><i>p</i></b> |
|------------------------------------------|---------------------------|------------------|-----------------|-----------------|
| Intercept                                | 0.035                     | [-0.182, 0.252]  | 0.314           | 0.753           |
| Time Phase 1 (Weeks 1-6)                 | 0.518                     | [ 0.102, 0.933]  | 2.442           | 0.015           |
| Discontinuity                            | 3.855                     | [ 3.000, 4.710]  | 8.841           | < 0.001         |
| Time Phase 2 (Weeks 7-15)                | -0.018                    | [-0.053, 0.016]  | -1.038          | 0.299           |
| Time Phase 3 (Weeks 16-30)               | -0.095                    | [-0.129, -0.062] | -5.592          | < 0.001         |
| ASI                                      | -0.024                    | [-0.037, -0.010] | -3.442          | 0.01            |
| Attendance Pattern                       | -1.006                    | [-1.329, -0.683] | -6.102          | < 0.001         |
| Treatment Condition                      | -0.011                    | [-0.238, 0.215]  | -0.098          | 0.922           |
| Attendance Pattern x Treatment Condition | 0.758                     | [-0.293, 1.223]  | 3.195           | 0.001           |
| ASI x Treatment Condition                | 0.024                     | [ 0.006, 0.041]  | 2.583           | 0.010           |

**General Notes:** Abstinence refers to both point prevalence and prolonged abstinence; SE=standard error; ASI=Anxiety Sensitivity Inventory; Exercise=participants received standard smoking cessation care and were randomly assigned to a 15-week exercise program; Control=participants received standard smoking cessation care and were randomly assigned to a 15-week wellness education control condition. Treatment condition was coded exercise=0, control=1. ASI was centered at high ASI (ASI=23). Attendance patterns were coded as Titrators=0, Completers=1.

**Final Model Selection Notes:** There was no significant interaction between ASI and attendance pattern so this term was dropped and the final model was recalculated. Interactions between treatment condition or attendance pattern and the slopes during the follow-up phase of the piecewise growth curve model were not significant and also removed from the final model; therefore, estimates of the effect of treatment condition and attendance pattern were identical when evaluating the model at post-treatment or 6-month follow-up. Thus, we report a single estimate reflecting treatment group and attendance group differences at post-treatment, and that estimate also reflects group differences at follow-up.
